# Supplementary material
Source: PubMed Central journal article supplement (PMC3234346)
Supplement: jbjs-2011-93-24-2271-s1.pdf [file jbjs-2011-93-24-2271-s1.pdf]

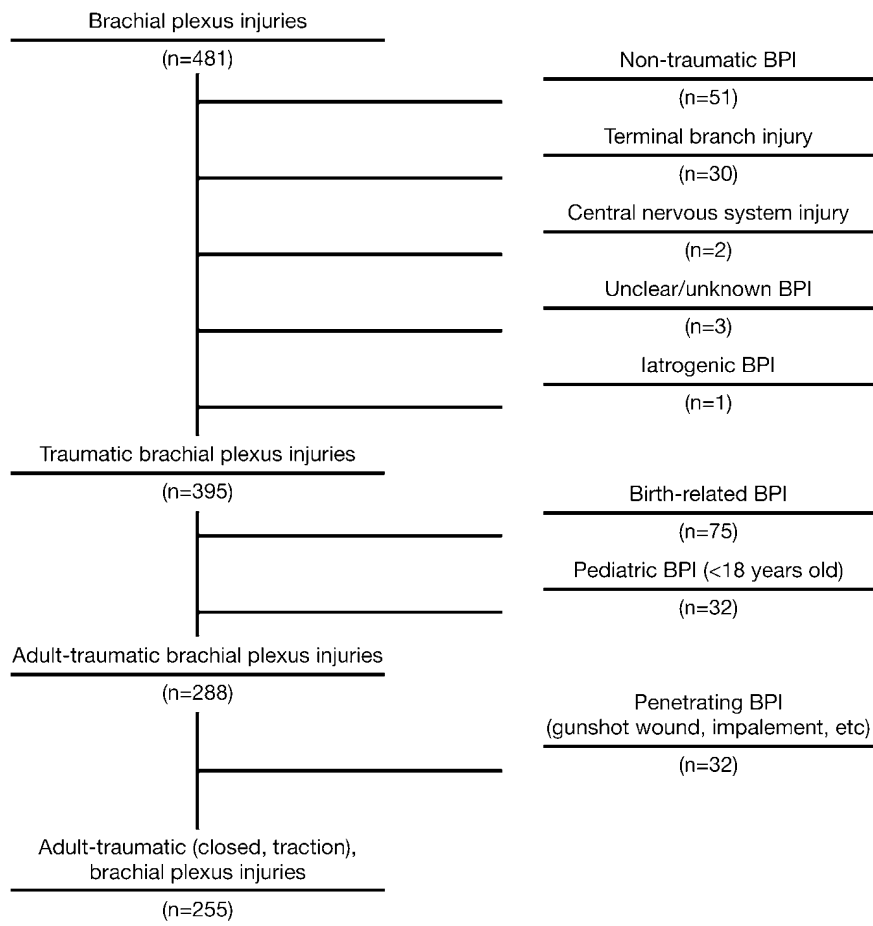

Fig. E-1  
 Patient inclusion and exclusion flowchart. BPI = brachial plexus injuries.

TABLE E-1 Associated Injuries in Combined Spinal Cord and Brachial Plexus-Injured Patients

| Location of Injury         | Number of Patients (%) |
|----------------------------|------------------------|
| Head or face               | 24 of 31 (77.4%)       |
| Axial spine fracture       | 20 of 31 (64.5%)       |
| Thoracic                   | 16 of 31 (51.6%)       |
| Injury on ipsilateral side | 16 of 16 (100%)        |
| Shoulder girdle            | 16 of 31 (51.6%)       |
| Injury on ipsilateral side | 15 of 16 (93.8%)       |
| Upper extremity            | 11 of 31 (35.5%)       |
| Injury on ipsilateral side | 11 of 11 (100%)        |
| Lower extremity            | 12 of 31 (38.7%)       |
| Injury on ipsilateral side | 9 of 12 (75%)          |
| Visceral                   | 3 of 31 (9.7%)         |
| Vascular                   | 4 of 31 (12.9%)        |

TABLE E-2 Imaging and Clinical Findings Suggestive of a Preganglionic Injury

| Findings                               | Number Suggestive of Injury |
|----------------------------------------|-----------------------------|
| Imaging findings                       |                             |
| Transverse or spinous process fracture | 9 of 31 (29%)               |
| Ipsilateral preganglionic injury       | 7 of 9 (77.8%)              |
| Abnormal phrenic nerve function        | 9 of 31 (29%)               |
| Ipsilateral C5 preganglionic injury    | 9 of 9 (100%)               |
| Clinical findings                      |                             |
| Abnormal serratus anterior strength    | 24 of 31 (77.4%)            |
| Ipsilateral C5-C7 preganglionic injury | 19 of 24 (79.2%)            |
| Horner sign                            | 20 of 31 (64.5%)            |
| Ipsilateral C8-T1 preganglionic injury | 16 of 20 (80%)              |
| Abnormal rhomboid (strength)           | 13 of 31 (41.9%)            |
| Ipsilateral C5 preganglionic injury    | 10 of 13 (76.9%)            |
| Abnormal rhomboid (on EMG)             | 9 of 31 (29%)               |
| Ipsilateral C5 preganglionic injury    | 8 of 9 (88.9%)              |
| Abnormal cervical paraspinal (on EMG)  | 13 of 31 (41.9%)            |

EMG = electromyogram.
